# Supplementary material
Source: publisher figshare collection journal article supplement (https://acs.figshare.com/ndownloader/files/10695472)
Supplement: Supplementary file 1 [file 10695472]

# Supplementary Information

## Structure and Function of Stony Coral Intra-Skeletal Polysaccharides

Annamaria Naggi, Giangiacomo Torri, Marcello Iacomini, Gabriele Colombo, Michela Reggi, Simona Fermani, Zvy Dubinsky, Stefano Goffredo and Giuseppe Falini\*

|            |         |
|------------|---------|
| Table S1   | pag. S2 |
| Table S2   | pag. S3 |
| Figure S1  | pag. S4 |
| Figure S2  | pag. S4 |
| Figure S3  | pag. S5 |
| Figure S4  | pag. S5 |
| Figure S4  | pag. S6 |
| References | pag. S6 |

**Table S1:** Assignment of organic compounds to bands on the FTIR spectra of *p*scOM;  $\nu$ -stretching vibration,  $\delta$ -bending vibrations, s-symmetric and as-asymmetric.

| Wave number<br>( $\text{cm}^{-1}$ ) | Assignment                                     |
|-------------------------------------|------------------------------------------------|
| 3422                                | $\nu(\text{O-H})$ : water molecules            |
| 2924                                | $\nu_{\text{as}}(\text{CH}_2)$ :               |
| 2854                                | $\nu_{\text{s}}(\text{CH}_2)$ :                |
| 1735                                | $\nu(\text{C=O})$ :                            |
| 1649-1634                           | Amide I: GAGs                                  |
| 1620                                | : uronic acid                                  |
| 1558                                | $\nu_{\text{as}}(\text{C=O})$ : $\text{COO}^-$ |
| 1540                                | $\nu_{\text{s}}(\text{C=O})$ : $\text{COO}^-$  |
| 1470-1400                           | $\delta(\text{CH}_2)$ : sugars                 |
| 1384                                | $\delta(\text{CH}_3)$ : O-acetyls              |
| 1255-1235                           | $\nu(\text{S=O})$ : esterified sulphate        |
| 1163                                | $\nu(\text{C-O-C})$ : glycosidic linkage       |
| 1078                                | $\nu(\text{C-O-C})$ : ether bonds              |
| 1036                                | $\nu(\text{C-C})$ : sugars                     |

The broad band detected around  $3422\text{ cm}^{-1}$  was assigned to  $\nu(\text{O-H})$  of water molecules. The bands assigned to asymmetric and symmetric stretching vibrations of the methyl and methylene groups were observed from  $3050$  to  $2750\text{ cm}^{-1}$ . At  $1735\text{ cm}^{-1}$  is located the band associated with stretching vibrations of the carbonyl group  $\nu(\text{C=O})$  that could be associated to the presence of acidic polysaccharides. Subsequent bands  $1649$ - $1634\text{ cm}^{-1}$  were associated to amide vibration modes of glycosaminoglycans.<sup>1</sup> The band at  $1620\text{ cm}^{-1}$  indicated the presence of uronic acid. The doublet at  $1558\text{ cm}^{-1}$  and  $1540\text{ cm}^{-1}$  corresponds to the asymmetric stretching vibration of carboxyl functional group. The bands between  $1470$  and  $1384\text{ cm}^{-1}$  could be attributable to scissoring vibration of  $\text{CH}_2$  (galactose, mannose) and asymmetric bending vibration of  $\text{CH}_3$  (fucose, O-acetyls).<sup>2,3</sup> The bands assigned to stretching vibrations of sulphate groups were observed from  $1255$  to  $1225\text{ cm}^{-1}$  and indicate the presence of esterified sulphate. The bands from  $1120$  to  $1030\text{ cm}^{-1}$  can be assigned to a stretching vibration of the C-O group and are dominated by glycosidic linkage and at lower frequencies (around  $1036\text{ cm}^{-1}$ ) were polysaccharides with mannose, arabinose and rhamnose constituents.<sup>4</sup>

**Table S2:** Proton and carbon NMR chemical shifts values of principal and minor components of *pscOM* from *S. pistillata*. Reference carbon chemical shifts data of oxidized curdlan are also reported.

| atom | Principal component           |                                    | Minor components |                               | Polyglucuronic acid <sup>5</sup> |        |
|------|-------------------------------|------------------------------------|------------------|-------------------------------|----------------------------------|--------|
|      | H (C)<br>chem shifts<br>(ppm) | <sup>3</sup> J<br>coupling<br>(Hz) |                  | H (C)<br>chem shifts<br>(ppm) |                                  |        |
| 1    | 4.86 (104.8)                  | 7.9                                | 5.02 (104.2)     | 5.06 (103.9)                  | 5.51 (101.8)                     | 101.87 |
| 2    | 3.59 (76.3)                   | 8.7                                | 4.12 (72.1*)     | 4.09 (nd*)                    | 4.10 (78-80*)                    | 73.27  |
| 3    | 3.82 (85.7)                   | 9.1                                |                  | 3.59* (nd)                    |                                  | 82.80  |
| 4    | 3.62 (73.2)                   | 9.1                                | n.d.             | 3.56 (88)                     | n.d.                             | 70.05  |
| 5    | 3.77 (78.7)                   | 9.5                                |                  | 3.82 (72.2)                   |                                  | 75.63  |
| 6    | - (178.5)                     |                                    |                  | 1.21*                         |                                  | 175.47 |

\* Indicative assignment

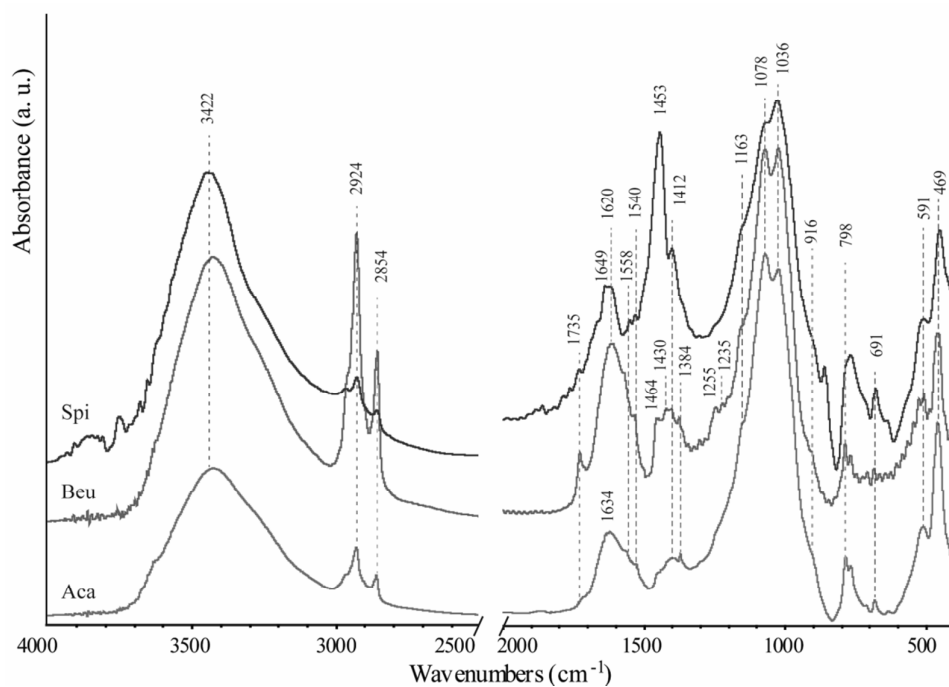

**Figure S1:** FTIR spectra of intra-skeletal polysaccharidic components of the organic matrix extracted from skeleton of *A. calycularis* (Aca), *B. europaea* (Beu), and *S. pistillata* (Spi).

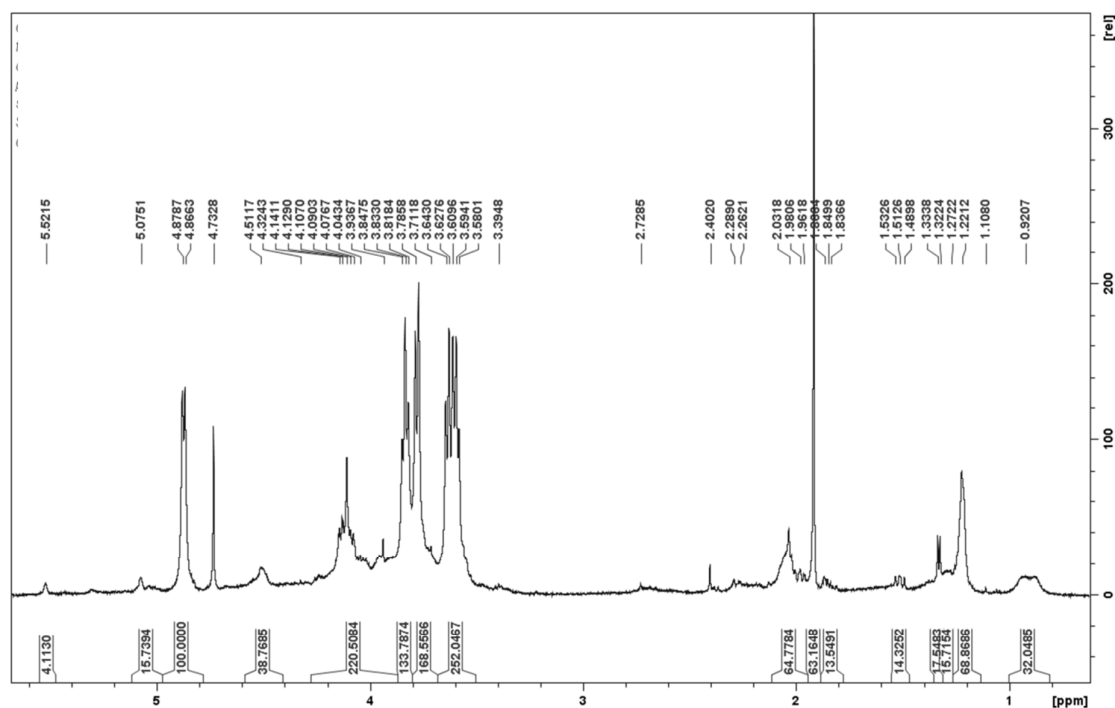

**Figure S2.**  $^1\text{H}$  NMR spectrum of the pscOM of *S. pistillata*.

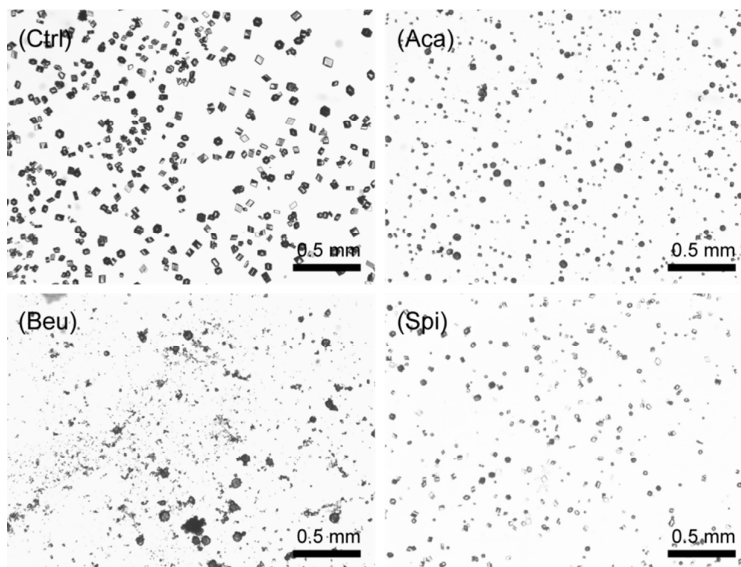

**Figure S3.** Optical microscope images of calcium carbonate particles precipitated in the absence of additives (Ctrl), in the presence of the *pscOM* extracted from *A. calycularis* (Aca), *B. europaea* (Beu) or *S. pistillata* (Spi).

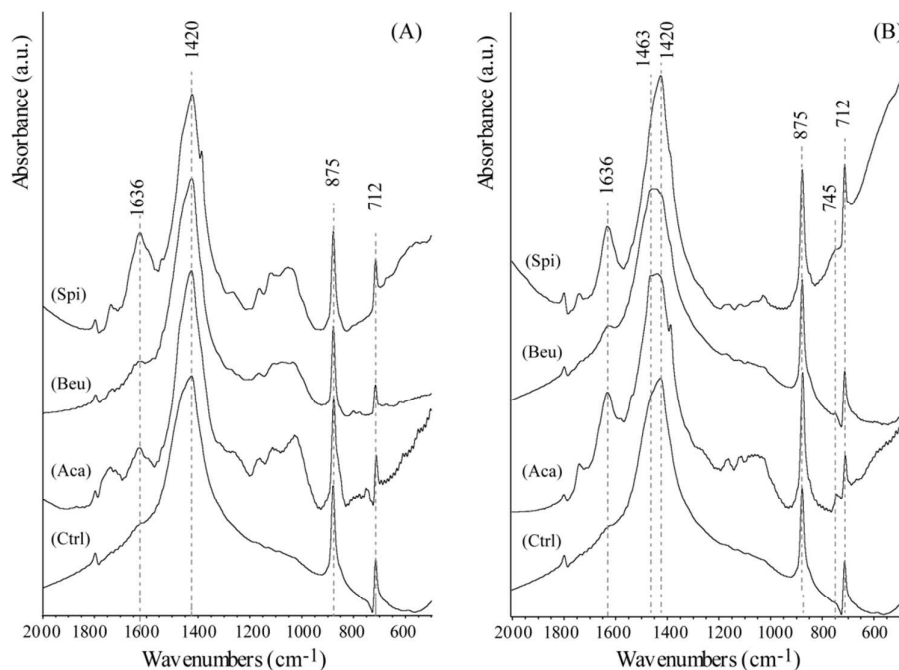

**Figure S4.** FTIR spectra of calcium carbonate precipitated from 10 mM  $\text{CaCl}_2$  solutions in the presence of wOMs (A) and *pscOM* (B) which were extracted from the skeletons of *A. calycularis* (Aca), *B. europaea* (Beu), *S. pistillata* (Spi). FTIR spectrum of calcium carbonate precipitated from 10 mM  $\text{CaCl}_2$  solution without additives is also reported (Ctrl). The wavenumbers of the main absorption bands are indicated. The bands at  $1420\text{ cm}^{-1}$ ,  $875\text{ cm}^{-1}$  and  $712\text{ cm}^{-1}$  are from calcite, the one at  $745\text{ cm}^{-1}$  is from vaterite and that at  $1636\text{ cm}^{-1}$  could be assigned to polysaccharide and water.

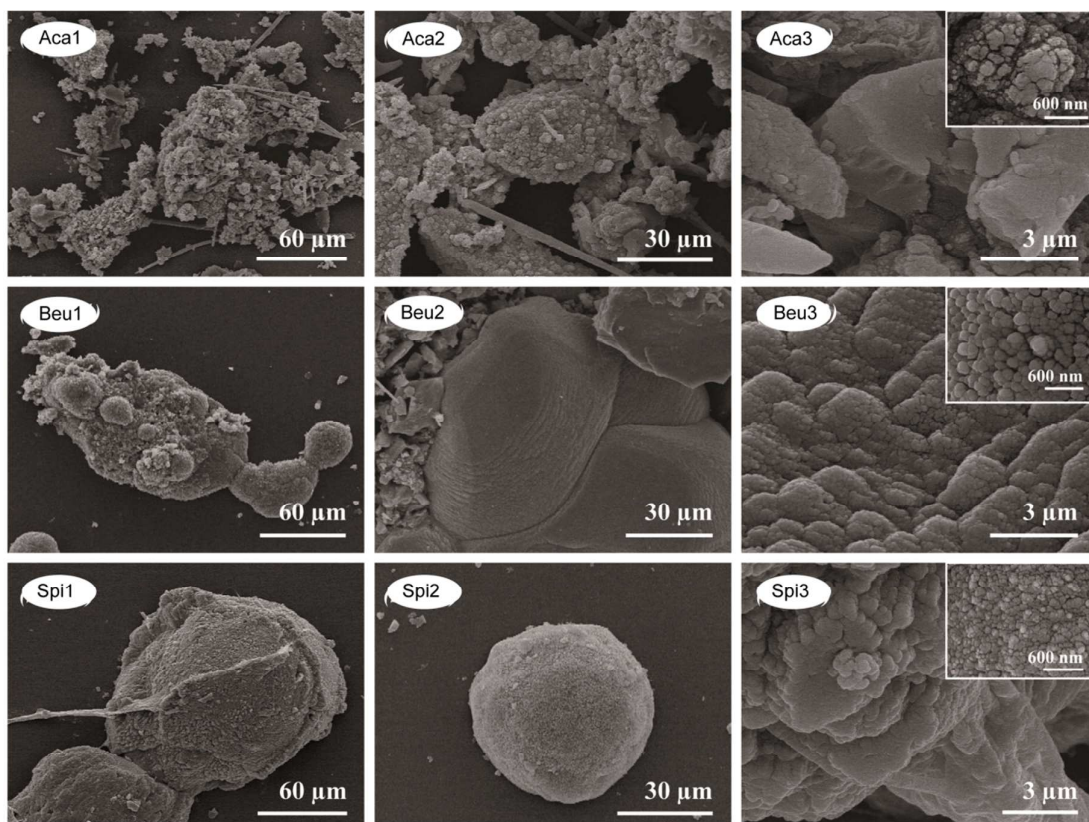

**Figure S5.** Scanning electron microscopy pictures at increasing magnification (1-3) of particles obtained from *in vitro*  $\text{CaCO}_3$  crystallization experiments from 10 mM  $\text{CaCl}_2$  solution in presence of wOM extracted from *A. calycularis* (Aca), *B. europaea* (Beu) and *S. pistillata* (Spi). In the column 3 particles that covered wOMs surface are showed. In the insets high magnification images are reported with the granular submicrometer particles from crystals surface. These pictures show most representative particles of each population.

## References

1. Arias, J.L.; Fernandez, M.S. Polysaccharides and Proteoglycans in Calcium Carbonate-based Biomineralization. *Chem. Rev.* **2008**, *108*, 4475.
2. Marxen, J.C.; Hammer, M.; Gehrke, T.; Becker, W. Carbohydrates of the Organic Shell Matrix and the Shell-Forming Tissue of the Snail *Biomphalaria glabrata* (Say). *Biol. Bull.* **1998**, *194*, 231.
3. Synytsya, A.; Kim, W.-J.; Kim, S.-M.; Pohl, R.; Synytsya, A.; Kvasnička, F.; Čopíková, J.; Park, Y. Structure and antitumour activity of fucoidan isolated from sporophyll of Korean brown seaweed *Undaria pinnatifida*. *Carb. Polym.* **2010**, *81*, 41.
4. Kačuráková, M.; Capek, P.; Sasinková, V.; Wellner, N.; Ebringerová, A. FT-IR Study of Plant Cell Wall Model Compounds Pectic Polysaccharides and Hemicelluloses. *Carb. Polym.* **2000**, *43*, 195.
